# Supplementary material for: Characterization of CD4+ and CD8+ T cells responses in the mixed lymphocyte reaction by flow cytometry and single cell RNA sequencing
Source: PubMed Central journal article supplement (PMC10820991; doi:10.3389/fimmu.2023.1320481), 2024-01-12
Supplement: Image_3.pdf [file Image_3.pdf]

A.

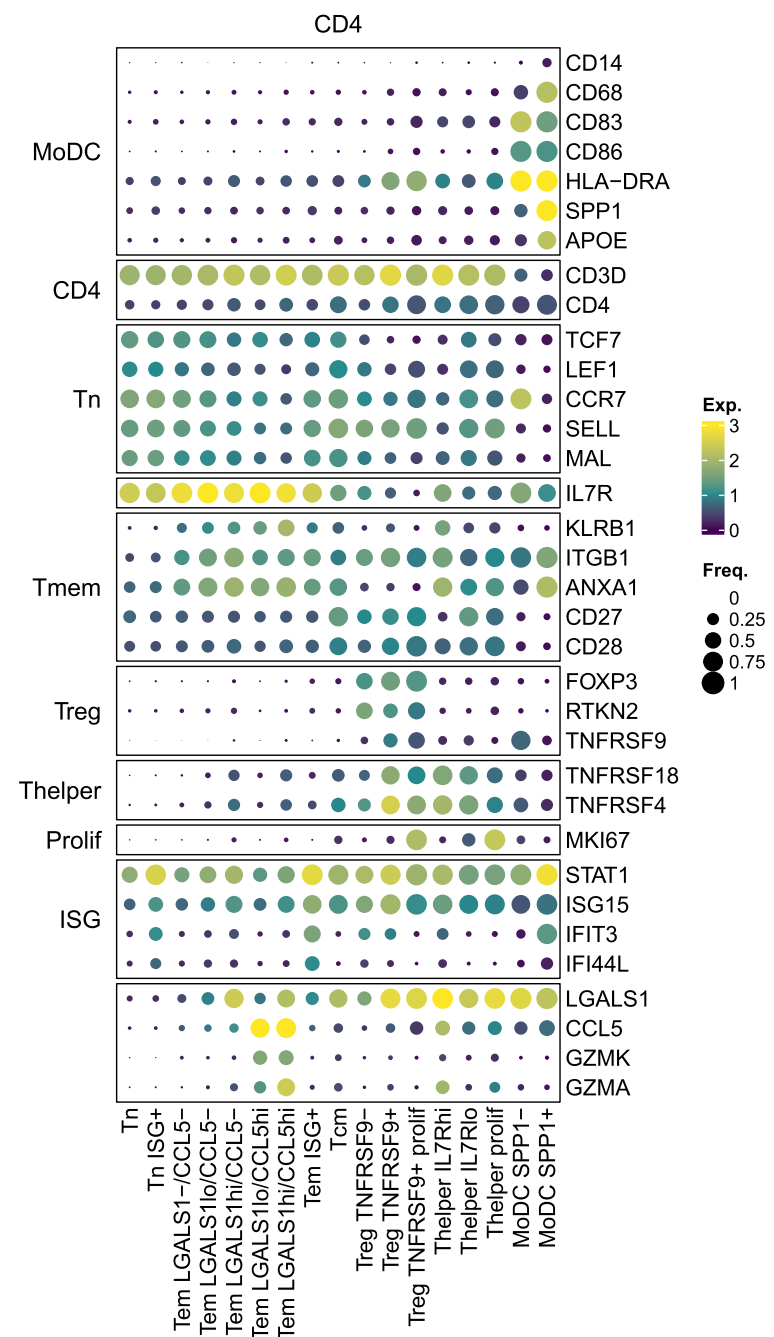

B.

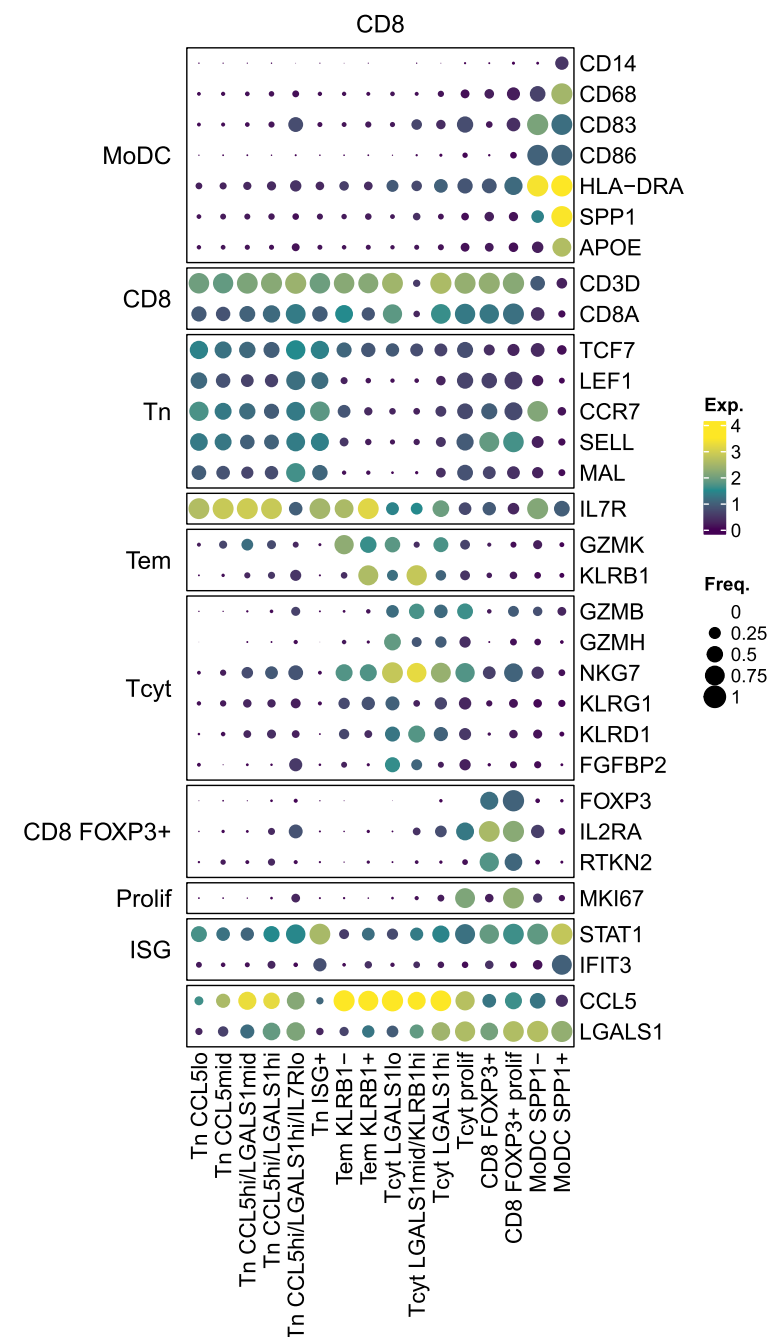

Figure S3
